# Supplementary material for: Different Apoptotic Pathways Activated by Oxaliplatin in Primary Astrocytes vs. Colo-Rectal Cancer Cells
Source: MDPI journal article supplement (doi:10.3390/ijms16035386), 2015-03-09
Supplement: s1 [file s1]

# Supplementary Information

**Table S1.** Comparison between astrocyte and HT-29 cell viability after 24 h incubation.

| Cell Viability %               |             |             |
|--------------------------------|-------------|-------------|
| Oxaliplatin Concentration (μM) | Astrocytes  | HT-29       |
| 0                              | 100.0 ± 0.0 | 100.0 ± 2.6 |
| 0.3                            | 95.4 ± 4.1  | 97.2 ± 3.5  |
| 1                              | 91.0 ± 2.6  | 92.4 ± 4.6  |
| 3                              | 82.3 ± 6.8  | 90.4 ± 4.2  |
| 10                             | 78.6 ± 2.4  | 85.3 ± 3.8  |
| 30                             | 74.6 ± 3.8  | 79.0 ± 2.9  |
| 100                            | 70.2 ± 2.2  | 65.4 ± 3.5  |

Astrocyte cells ( $1 \times 10^4$  cells/well) or HT-29 cells ( $5 \times 10^3$  cells) were treated with increasing concentrations of oxaliplatin (1–100 μM). Incubation was allowed for 24 h. Cell viability was measured by MTT assay. Control condition was arbitrarily set as 100% and values are expressed as the mean ± S.E.M. of three experiments.
